# Supplementary material for: Relationship between COVID-19 and ICU-Acquired Bloodstream Infections Related to Multidrug-Resistant Bacteria
Source: MDPI journal article supplement (doi:10.3390/antibiotics12071105), 2023-06-25
Supplement: s1 [file s1]

**Table S1. Relationship between COVID-19 and ICU-acquired BSI related to MDRB by Fine et Gray Model**

|                           | COVID(-)     | COVID(+)      | Unadjusted analysis  |         | Adjusted analysis     |         |
|---------------------------|--------------|---------------|----------------------|---------|-----------------------|---------|
|                           | (n=823)      | (n=497)       | sHR (95%CI)          | P-Value | sHR (95%CI)           | P-Value |
| <b>MDRB</b>               | 14/823 (1.7) | 36/497 (7.2)  | 4.34 (2.33 to 8.06)  | <0.001  | 5.76 (2.82 to 11.73)  | <0.001  |
| 0 to 14 days <sup>1</sup> | 8/823 (1.0)  | 8/497 (1.6)   | 1.66 (0.62 to 4.42)  | 0.18    | 2.20 (0.81 to 5.94)   | 0.063   |
| 15 to 30 days             | 6/137 (4.2)  | 28/190 (14.8) | 7.93 (3.27 to 19.20) | <0.001  | 10.53 (3.84 to 28.84) | <0.001  |

**Figure S1.**

**60-day cumulative incidence of A) ICU-mortality, B) Extubation Alive (mechanical ventilation duration), and C) ICU discharge alive (length of ICU stay) according to disease study groups.**

Cumulative incidences were estimated using Kalbfleisch and Prentice method by considering for A), ICU mortality as event of interest and ICU-discharge alive as competing event, for B), extubation alive as event of interest and death under mechanical ventilation as competing event, and C) ICU discharge alive as event of interest and ICU mortality as competing event.

A)

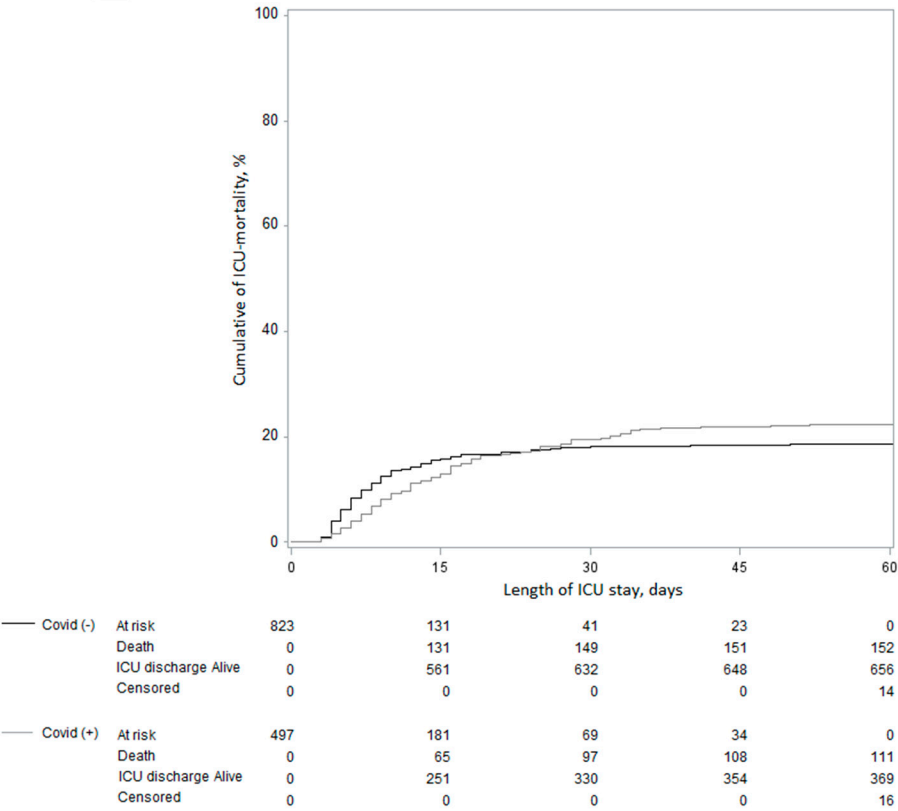

B)

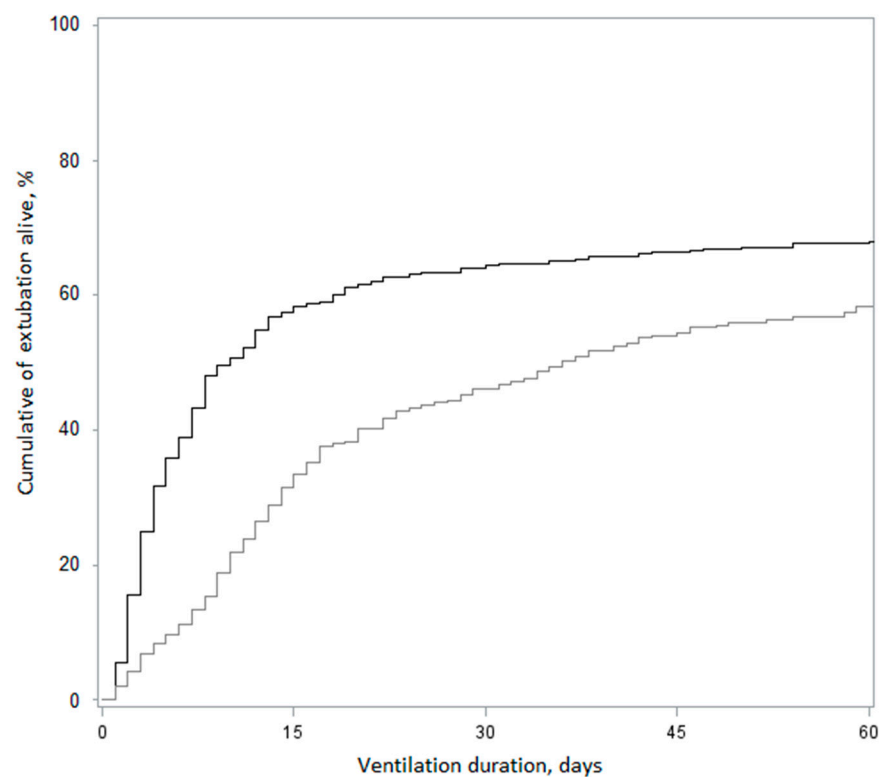

|               |                  |     |     |     |     |     |
|---------------|------------------|-----|-----|-----|-----|-----|
| — Covid (-)   | At risk          | 398 | 59  | 19  | 9   | 0   |
|               | extubation Alive | 0   | 232 | 256 | 264 | 270 |
|               | Death            | 0   | 107 | 123 | 125 | 125 |
|               | Censored         | 0   | 0   | 0   | 0   | 3   |
| - - Covid (+) | At risk          | 261 | 117 | 51  | 22  | 0   |
|               | extubation Alive | 0   | 87  | 120 | 142 | 152 |
|               | Death            | 0   | 57  | 123 | 125 | 125 |
|               | Censored         | 0   | 0   | 0   | 0   | 3   |

c)

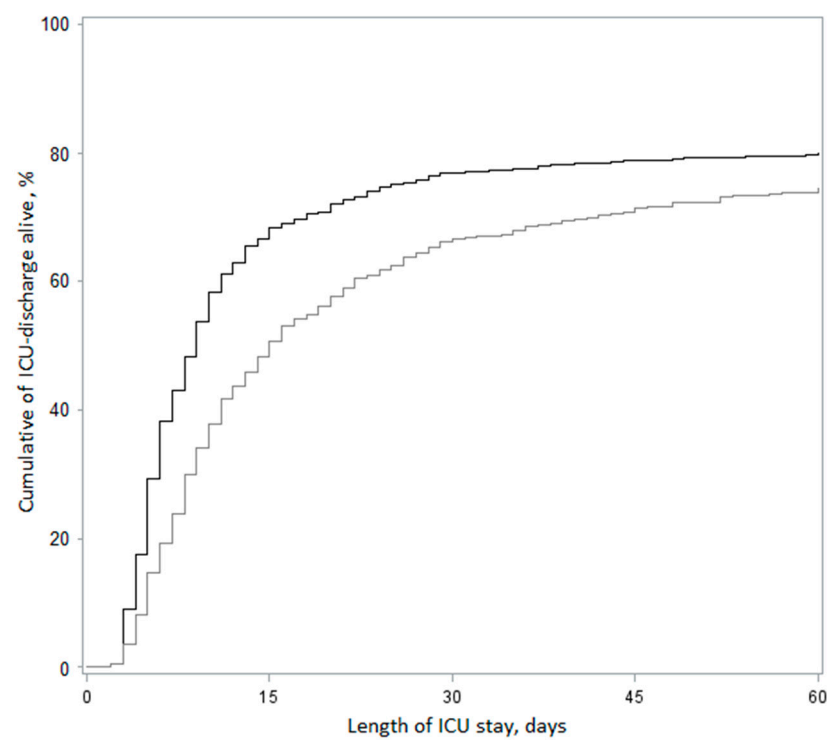

|             |                     |     |     |     |     |     |
|-------------|---------------------|-----|-----|-----|-----|-----|
| — Covid (-) | At risk             | 823 | 131 | 41  | 23  | 0   |
|             | ICU discharge Alive | 0   | 561 | 632 | 648 | 656 |
|             | Death               | 0   | 131 | 149 | 151 | 152 |
|             | Censored            | 0   | 0   | 0   | 0   | 14  |
| — Covid (+) | At risk             | 497 | 181 | 69  | 34  | 0   |
|             | ICU discharge Alive | 0   | 251 | 330 | 354 | 369 |
|             | Death               | 0   | 65  | 97  | 108 | 111 |
|             | Censored            | 0   | 0   | 0   | 0   | 16  |
